# Supplementary material for: P084 The Relationship Between Middle-School Children's Body Mass Index, School Lunch Participation and Consumption
Source: Elsevier journal article supplement (doi:10.1016/j.jneb.2022.04.124), 2022-07-01
Supplement: mmc69 [file mmc69.pdf]

# The Relationship Between Middle-School Children's Body Mass Index,

# School Lunch Participation and Consumption

## BACKGROUND

- One in five US school-aged children is obese.<sup>1</sup>
- The National School Lunch program accounts for about 1/3 of total daily calories for children.<sup>2</sup>
- Previous research on obesity and school-lunch consumption has not included middle school,<sup>3-5</sup> an important time to establish lifestyle habits that persist into adulthood.

## OBJECTIVE

To explore the relationship between school-lunch participation and consumption with child body mass index (BMI).

## METHODS

- Secondary analysis of data from middle-school students in Birmingham, AL.
- Child weight and height were measured to calculate BMI and categorized based on BMI-for-age percentiles.<sup>6</sup>
- School lunch participation was categorized as usual participant (UP, 3~5 days/ week) & non-usual participants (UNP, 0~2 days/ week)
- At pre- and post-lunch, researchers weighed and photographed school-lunch trays for 5 consecutive weekdays to capture amounts in grams.
  - "Offer-versus-serve" was available so students could refuse some meal components.

Pre-lunch weighing

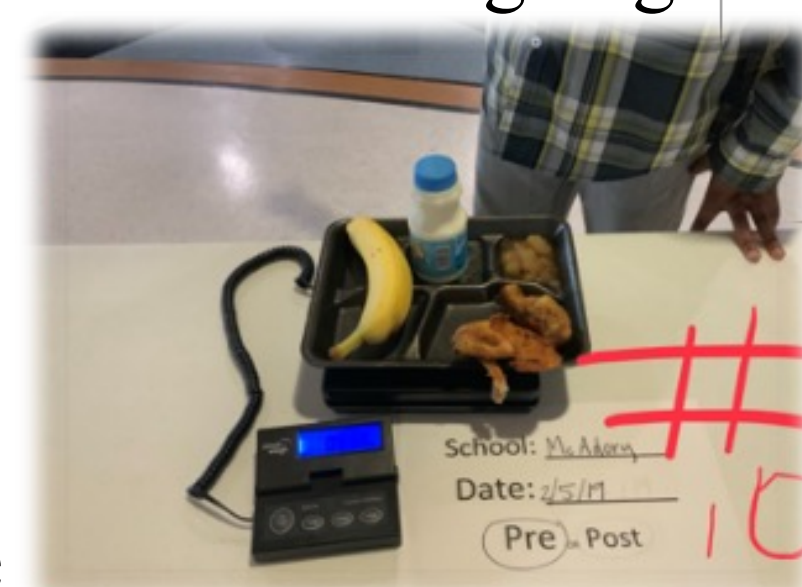

Post-lunch weighing

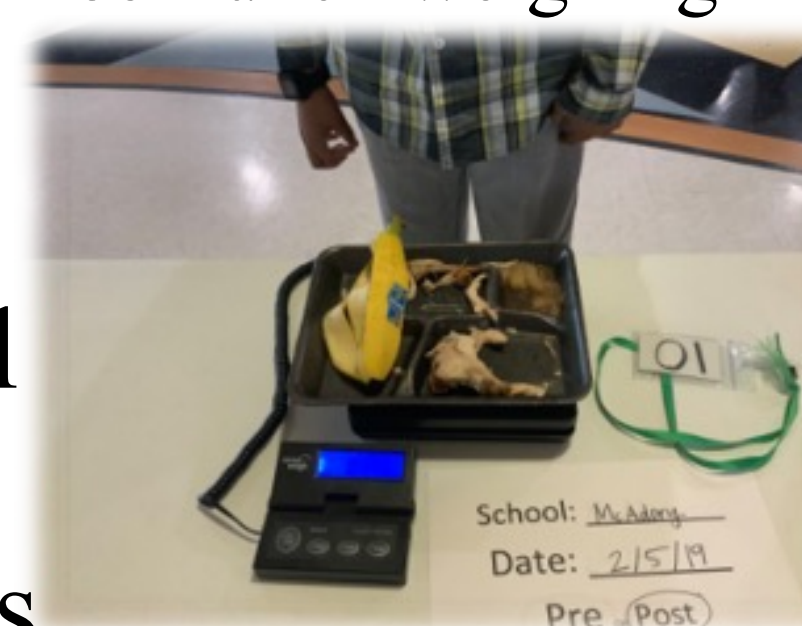

Free and Reduced Lunch Eligibility Percentages  
County A: 33-94% (5 schools)  
County B: 58-92% (4 schools)  
County C: 15-73% (3 schools)  
County D: 54% (1 school)  
County E: 95% (1 school)  
County F: 7% (1 school)

## RESULTS

Table 1. Characteristics of participants (n=288)

| Characteristic            | Category                                                         | Value       |
|---------------------------|------------------------------------------------------------------|-------------|
| Child sex                 | Male                                                             | 133 (46.2%) |
|                           | Female                                                           | 155 (53.8%) |
| Child age                 | 12.1 ±0.4 (range: 11.1-13.7) years                               |             |
| Child race/ethnicity      | White                                                            | 104 (36.1%) |
|                           | African American                                                 | 134 (46.5%) |
|                           | Hispanic/Latino                                                  | 27 (9.4%)   |
|                           | Other                                                            | 15 (5.2%)   |
| BMI Category <sup>6</sup> | Underweight (<5 <sup>th</sup> percentile)                        | 5 (1.7%)    |
|                           | Healthy Weight (≤5 <sup>th</sup> percentiles <85 <sup>th</sup> ) | 131 (45.7%) |
|                           | Overweight (≥85 <sup>th</sup> percentiles <95 <sup>th</sup> )    | 55 (19.2%)  |
|                           | Obese (≥95 <sup>th</sup> percentile)                             | 96 (33.4%)  |
| Family income (\$/year)   | <20,000                                                          | 22.9%       |
|                           | 20,000~40,000                                                    | 22.9%       |
|                           | 40,000~60,000                                                    | 14.7%       |
|                           | 60,000-90,000                                                    | 13.9%       |
|                           | >90,000                                                          | 25.7%       |

Table 2. Mixed-effects regression results with BMI as the dependent variable

| Variable                                             | β                | P-value | Reference Group     |         |
|------------------------------------------------------|------------------|---------|---------------------|---------|
| Average Consumption (grams)                          | 1.82             | 0.0001* |                     |         |
| School Lunch Participation (Non-usual participation) | 0.35             | 0.74    | Usual Participation |         |
| Age                                                  | -0.41            | 0.37    |                     |         |
| Gender (Male)                                        | 0.0004           | 0.99    | Female              |         |
| Child Race/ethnicity                                 | African American | 1.05    | 0.36                | White   |
|                                                      | Hispanic/Latino  | 2.76    | 0.11                |         |
|                                                      | Others           | 2.37    | 0.22                |         |
| Family Income (\$/year)                              | <20,000          | 2.16    | 0.12                | >90,000 |
|                                                      | 20,000~40,000    | 3.76    | 0.01                |         |
|                                                      | 40,000~60,000    | 1.12    | 0.45                |         |
|                                                      | 60,000-90,000    | 1.49    | 0.32                |         |

Note: Average Consumption (grams)=average of pre-weight – post-weight

- Mixed-effects regression explored BMI with school lunch participation and average consumption of school lunch as independent variables using standardized analysis. Age, gender, race/ethnicity, family income as fixed effects and school site as a random effect. (\*p-value<0.001)

Fig. 1 Average Consumption (grams) by child BMI category

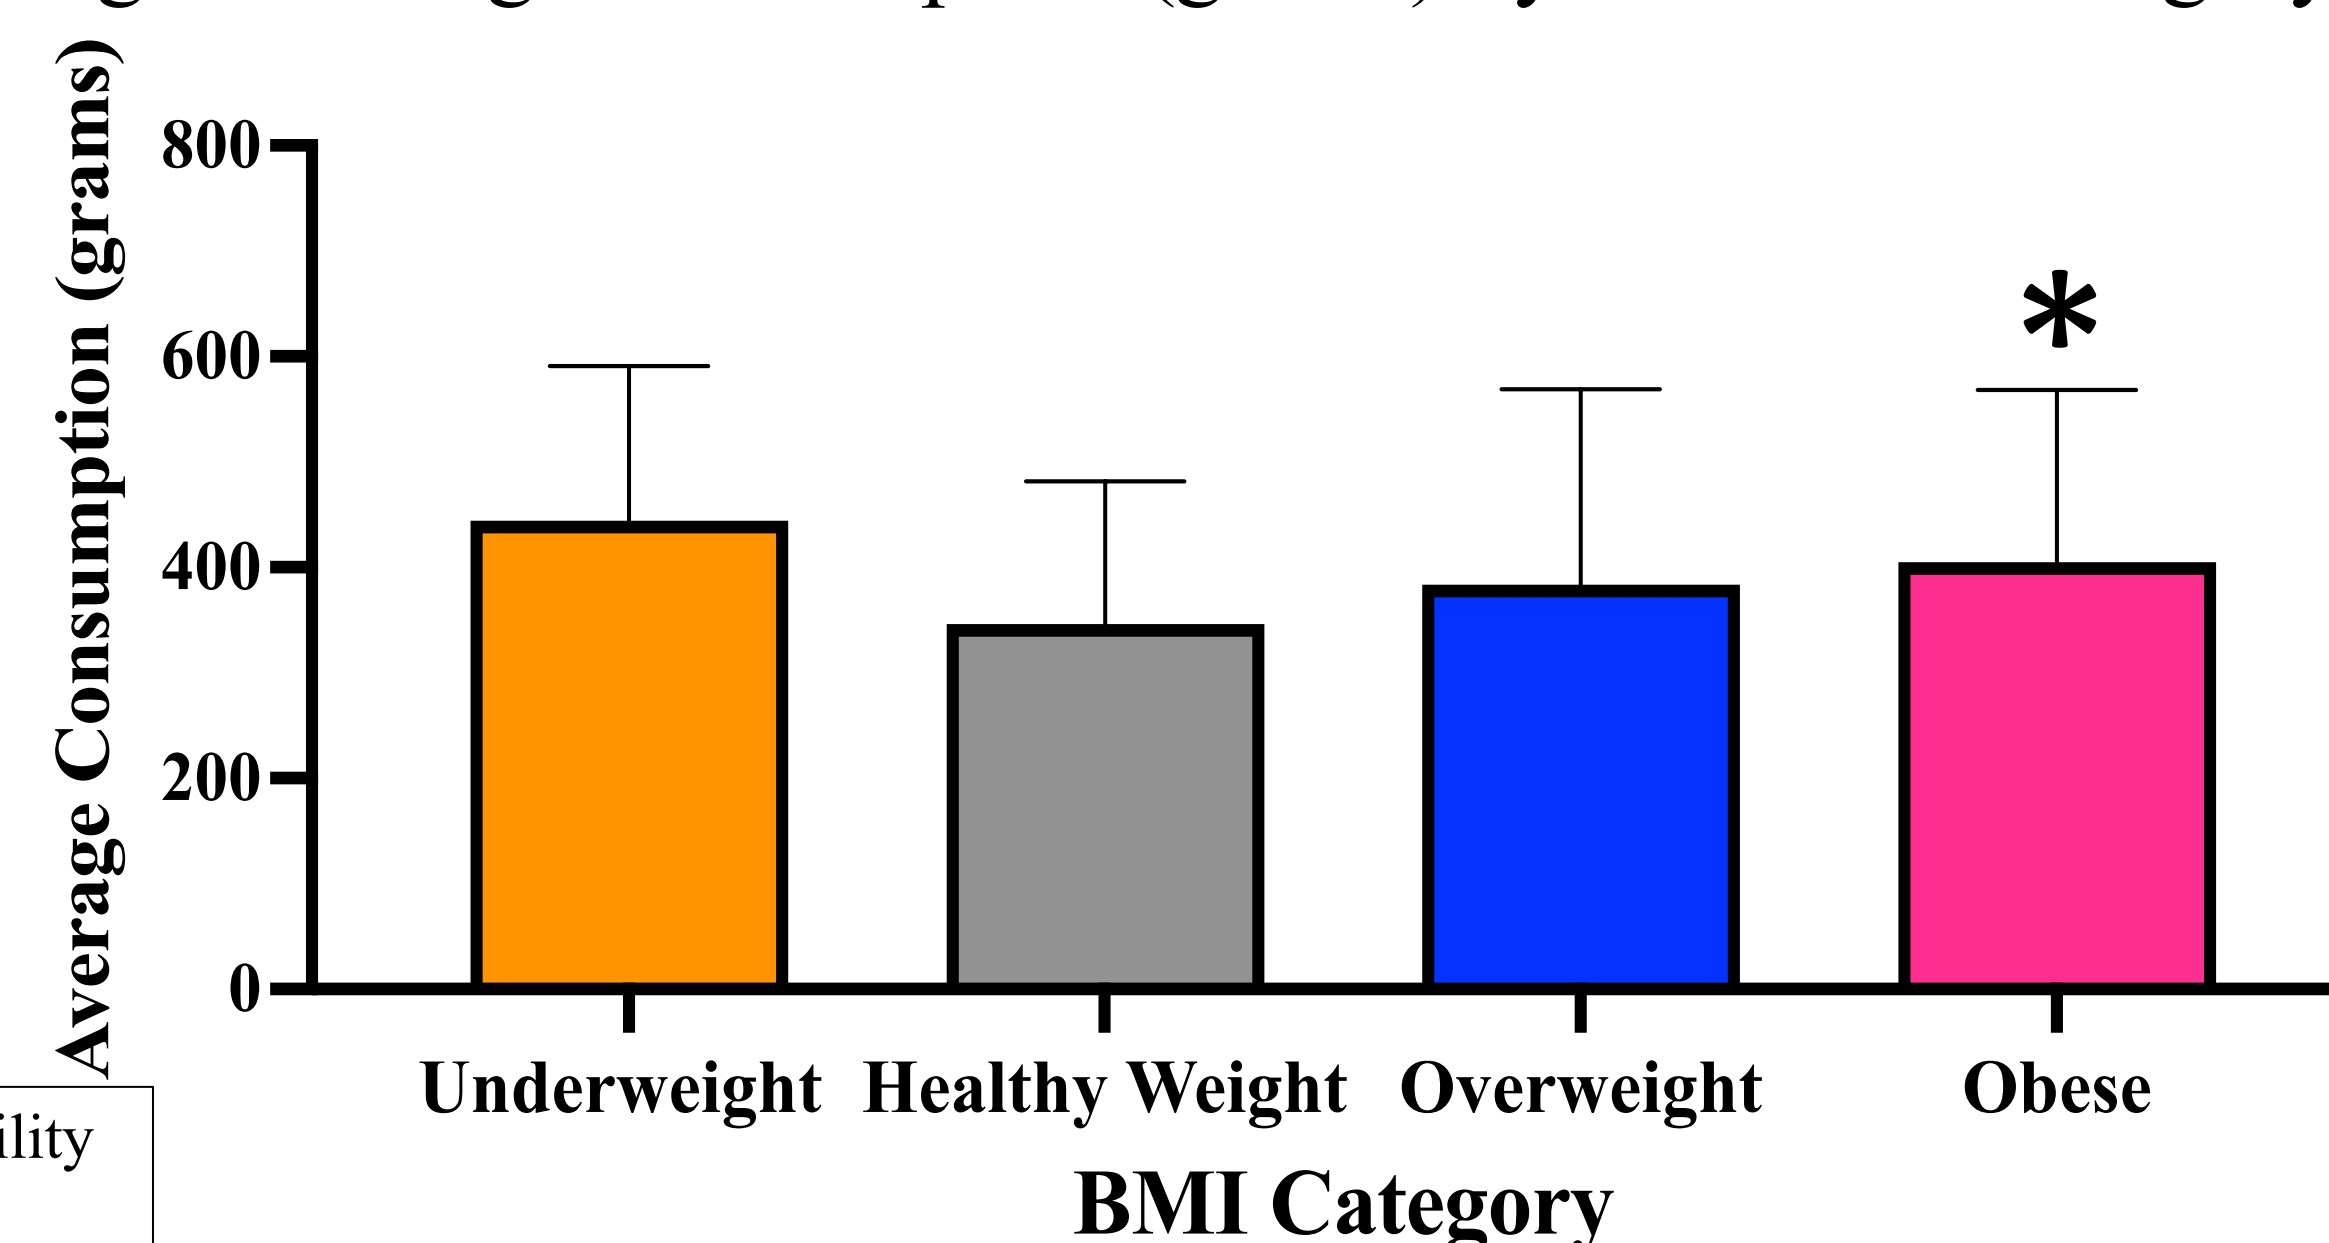

- Bars show Mean ± SD of average consumption of school lunch in grams. ANOVA with multiple comparisons using healthy weight group as reference. (\*p-value<0.05)

## CONCLUSIONS

- School-lunch consumption was positively related with BMI and obesity risk among middle school children. More grams of lunch were consumed as BMI increased.
- Future analyses will assess association of energy intake and food groups at school lunch with BMI and BMI category.

**Acknowledgements:** The research reported here was part of a larger study supported by the Institute of Education Sciences, U.S. Department of Education, through Grant R305A180074 to the University of Alabama at Birmingham. The opinions expressed are those of the authors and do not represent views of the Institute or the U.S. Department of Education.

## REFERENCES

- <sup>1</sup>CDC. *Morbidity and Mortality Weekly Report (MMWR)*. 2021
- <sup>2</sup>Cullen & Chen. *Preventive Medicine Reports*. 2017
- <sup>3</sup>Guinn et al. *J Sch Health*. 2013.
- <sup>4</sup>Baxter et al. *Int J Behav Nutr Phys Ac*. 2010
- <sup>5</sup>Paxton et al. *J Acad Nutr Diet*. 2012
- <sup>6</sup>CDC 2000 growth charts: United States. <http://www.cdc.gov/growthcharts/>
